# Supplementary material for: Evaluation procedure of photocatalysts for VOCs degradation from the view of density functional theory calculations: g-C3N4 dots/graphene as an example
Source: Royal Society of Chemistry journal article supplement (doi:10.1039/d0ta06060g), 2020-01-01
Supplement: d0ta06060g1.pdf [file d0ta06060g1.pdf]

## Supporting information

### **Evaluation procedure of photocatalysts for VOCs degradation from the view of density functional theory calculations: g-C<sub>3</sub>N<sub>4</sub> dots/graphene as an example**

Binghua Jing,<sup>a</sup> Zhimin Ao,<sup>\*a</sup> Weina Zhao,<sup>a</sup> Ying Xu,<sup>b</sup> Zhongfang Chen,<sup>c</sup> and Taicheng An<sup>a</sup>

*a. Guangdong Key Laboratory of Environmental Catalysis and Health Risk Control, Guangzhou Key Laboratory Environmental Catalysis and Pollution Control, School of Environmental Science and Engineering, Institute of Environmental Health and Pollution Control, Guangdong University of Technology, Guangzhou 510006, China.*

*b. School of Physics and Electronic Science, Hunan University of Science and Technology, Xiangtan 411201, China.*

*c. Department of Chemistry, University of Puerto Rico, Rio Piedras, San Juan, PR 00931, USA.*

\* Corresponding Author: E-mail address: [zhimin.ao@gdut.edu.cn](mailto:zhimin.ao@gdut.edu.cn)

**Text S1** The bandgaps of 5 $\times$ 5 and 10 $\times$ 10 g-C<sub>3</sub>N<sub>4</sub> dots/graphene are both 0.009 eV from our calculation with GGA-PBE as shown in Fig. S4(a), while the corresponding adsorption spectrum is also consistent with each other as shown in Fig. S4(b). Therefore, the influence of size effect of the supercell is insignificant.

**Text S2** There is big difference for the efficiency of formaldehyde degradation with or without the presence of  $\cdot$ OH radical or both  $\cdot$ OH and  $\cdot$ O<sub>2</sub><sup>-</sup> radicals. In addition, the reaction rate of formaldehyde degradation under both  $\cdot$ OH and  $\cdot$ O<sub>2</sub><sup>-</sup> radicals is quicker than that with  $\cdot$ OH radical only because of the shorter reaction pathways as shown in Fig. S7. Noted  $\cdot$ O<sub>2</sub><sup>-</sup> only plays an insignificant effect on the degradation of formaldehyde.

**Table S1** The total and interface interaction energies of the four stacking configurations

| Structure             | Figure 1a | Figure 1b | Figure 1c  | Figure 1d  |
|-----------------------|-----------|-----------|------------|------------|
| $E_{total}/\text{eV}$ | -9941.846 | -9941.833 | -11489.229 | -11489.415 |
| $E_{ads}/\text{eV}$   | -0.462    | -0.449    | -19.540    | -19.727    |

**Table S2** Different configurations of VOCs adsorption

|              | $g\text{-C}_3\text{N}_4$ | graphene | complex |
|--------------|--------------------------|----------|---------|
| Benzene      |                          |          |         |
| Toluene      |                          |          |         |
| Formaldehyde |                          |          |         |
| Styrene      |                          |          |         |
| TCE          |                          |          |         |

**Table S3** Different configurations of H<sub>2</sub>O and O<sub>2</sub> adsorption

|                  | g-C <sub>3</sub> N <sub>4</sub>                                                   | graphene                                                                           | complex                                                                             |
|------------------|-----------------------------------------------------------------------------------|------------------------------------------------------------------------------------|-------------------------------------------------------------------------------------|
| H <sub>2</sub> O | 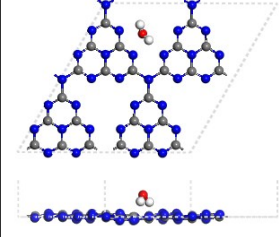 |  |  |
| O <sub>2</sub>   |  |  |  |

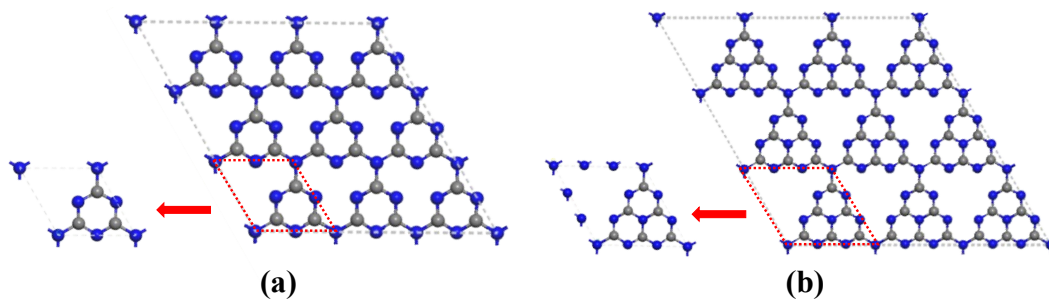

**Fig. S1** The scheme of *s*-triazine g-C<sub>3</sub>N<sub>4</sub> (a) and *tri-s*-triazine g-C<sub>3</sub>N<sub>4</sub> (b). Atom color code in this and following figures: carbon (grey), nitrogen (blue), hydrogen (white).

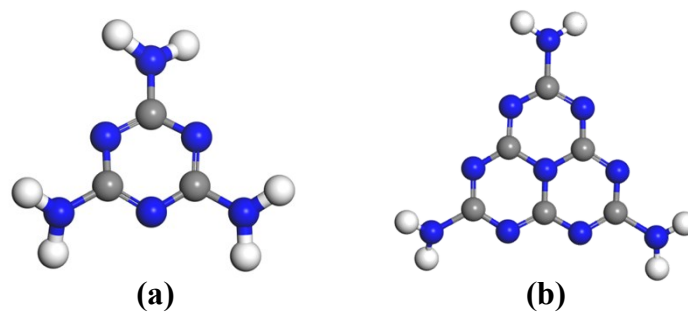

**Fig. S2** The scheme of *s*-triazine g-C<sub>3</sub>N<sub>4</sub> dots (a) and *tri-s*-triazine g-C<sub>3</sub>N<sub>4</sub> dots (b).

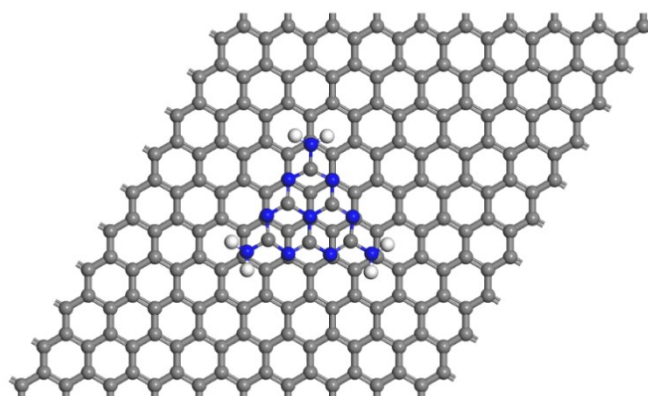

**Fig. S3** The configuration of g-C<sub>3</sub>N<sub>4</sub> dots in graphene with 10x10 supercell. The adsorption energy is -19.699 eV.

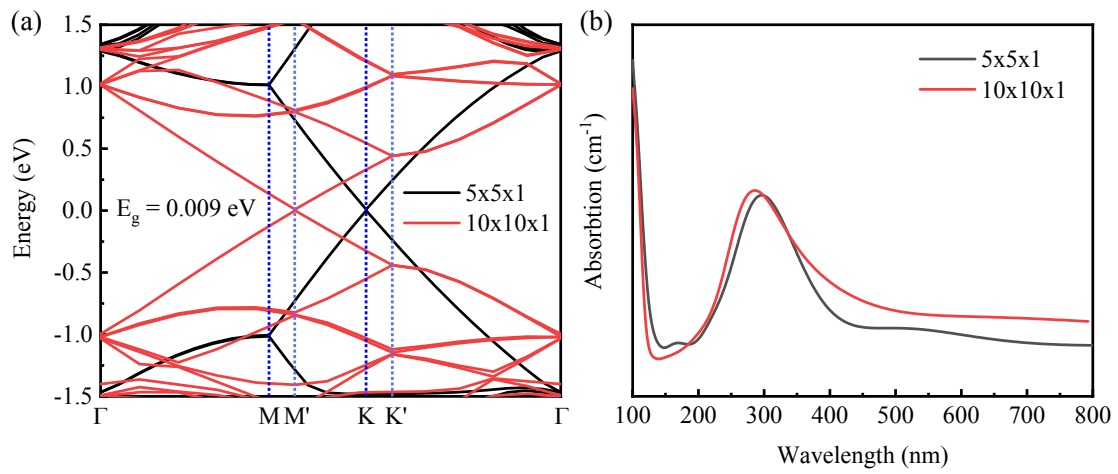

**Fig. S4** The band structure (a) and optical adsorption (b) of  $g\text{-C}_3\text{N}_4$  dots in  $5 \times 5 \times 1$  and  $10 \times 10 \times 1$  graphene.

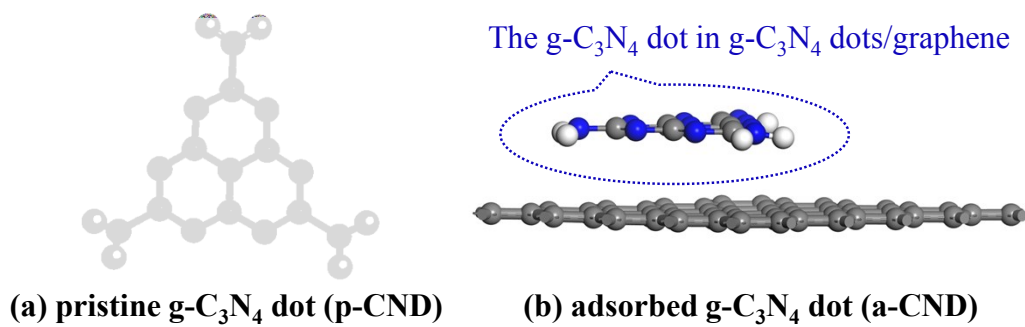

**Fig. S5** The *tri-s-triazine*  $g\text{-C}_3\text{N}_4$  dots under pristine condition (a) and composite condition (b).

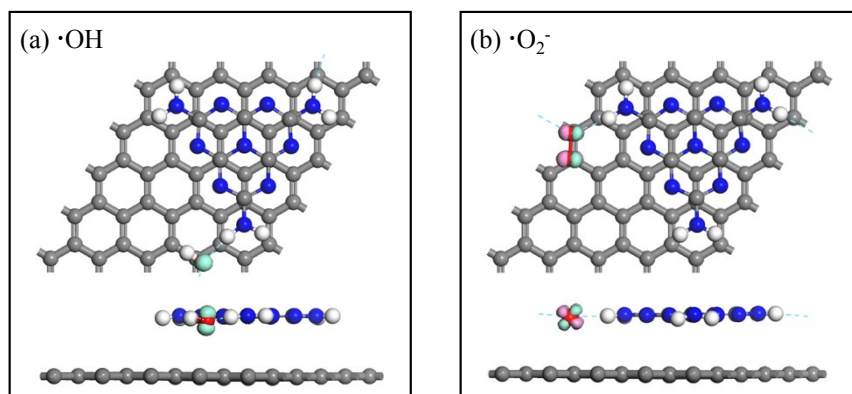

**Fig. S6** The spin density of  $\cdot\text{OH}$  (a) and  $\cdot\text{O}_2^-$  (b) on  $g\text{-C}_3\text{N}_4$  dots/graphene. The colors of spin density represent the different directions of spin.

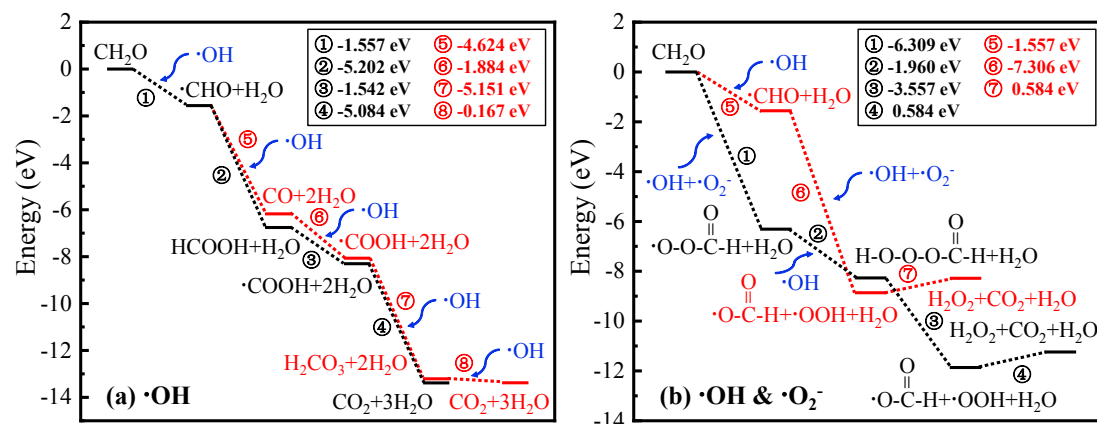

**Fig. S7** The reaction pathways for formaldehyde degradation in the presence of  $\cdot\text{OH}$  radical (a) and both  $\cdot\text{OH}$  and  $\cdot\text{O}_2^-$  radicals (b). Red and black lines represent the different reaction pathway. Reactants, products and energy barriers are marked in the corresponding places. The numbers represent different reaction steps.
